# Supplementary material for: Patient-Reported Outcomes from a Pilot Plant-Based Lifestyle Medicine Program in a Safety-Net Setting
Source: MDPI journal article supplement (doi:10.3390/nu15132857), 2023-06-24
Supplement: s1 [file s1]

**Table S1. Barriers to Adopting a Plant-Based Diet (n=71)**

|                                                                                              | Baseline |         | 3-Month Follow-Up |         | 6-Month Follow-Up |         | Baseline to 3-Month Change | 3- to 6-Month Change | Baseline to 6-Month Change |
|----------------------------------------------------------------------------------------------|----------|---------|-------------------|---------|-------------------|---------|----------------------------|----------------------|----------------------------|
| Agree/Strongly agree                                                                         | N        | Percent | N                 | Percent | N                 | Percent | p-value                    | p-value              | p-value                    |
| You are not sure how to be healthy on a plant-based diet                                     | 68       | 52.9    | 68                | 29.4    | 69                | 13.0    | p < 0.001                  | p = 0.003            | p < 0.001                  |
| You don't want to change your eating habits or routine                                       | 71       | 7.0     | 71                | 7.0     | 70                | 7.1     | p = 1.00                   | p = 1.00             | p = 1.00                   |
| Your family or partner won't eat a plant-based diet                                          | 58       | 51.7    | 58                | 43.1    | 57                | 40.4    | p = 0.332                  | p = 1.00             | p = 0.503                  |
| There is not enough choice when you eat out                                                  | 70       | 68.6    | 70                | 67.1    | 70                | 60.0    | p = 1.00                   | p = 0.227            | p = 0.189                  |
| You do not have enough willpower to change to a plant-based diet                             | 69       | 26.1    | 69                | 20.3    | 70                | 12.9    | p = 0.454                  | p = 0.227            | p = 0.031                  |
| Someone else decides on most of the food you eat                                             | 71       | 11.3    | 71                | 4.2     | 71                | 8.5     | p = 0.125                  | p = 0.453            | p = 0.727                  |
| It would be too expensive                                                                    | 68       | 30.9    | 68                | 30.9    | 69                | 23.2    | p = 1.00                   | p = 0.180            | p = 0.227                  |
| You don't like the taste of many of the foods that are the foundation of a plant-based diets | 69       | 8.7     | 69                | 10.1    | 70                | 7.1     | p = 1.00                   | p = 0.500            | p = 1.00                   |
| You would have to go food shopping too often                                                 | 70       | 42.9    | 70                | 45.7    | 70                | 40.0    | p = 0.815                  | p = 0.267            | p = 1.00                   |
| You would get indigestion, bloating, or gas                                                  | 65       | 24.6    | 65                | 24.6    | 69                | 27.5    | p = 1.00                   | p = 1.00             | p = 1.00                   |
| It would not be filling enough                                                               | 69       | 17.4    | 69                | 14.5    | 69                | 13.0    | p = 0.791                  | p = 1.00             | p = 1.00                   |
| You would (or do) crave meat, dairy, or eggs                                                 | 71       | 46.5    | 71                | 39.4    | 71                | 31.0    | p = 0.302                  | p = 0.210            | p = 0.013                  |
| You don't know how to prepare plant-based meals                                              | 69       | 55.1    | 69                | 29.0    | 68                | 20.6    | p < 0.001                  | p = 0.180            | p < 0.001                  |
| It would not be tasty enough                                                                 | 67       | 17.9    | 67                | 16.4    | 69                | 15.9    | p = 1.00                   | p = 1.00             | p = 0.791                  |
| The plant-based foods you would need aren't available where you shop                         | 69       | 27.5    | 69                | 23.2    | 71                | 28.2    | p = 0.549                  | p = 0.774            | p = 1.00                   |
| You don't know what to eat on a plant-based diet                                             | 69       | 53.6    | 69                | 17.4    | 69                | 11.6    | p < 0.001                  | p = 0.219            | p < 0.001                  |
| It takes too long to prepare plant-based meals                                               | 62       | 30.6    | 62                | 30.6    | 70                | 30.0    | p = 1.00                   | p = 1.00             | p = 1.00                   |
| It takes too much planning to eat a plant-based diet                                         | 63       | 54.0    | 63                | 49.2    | 70                | 42.9    | p = 0.607                  | p = 0.607            | p = 0.092                  |
| You don't know anyone who eats a plant-based diet                                            | 71       | 43.7    | 71                | 36.6    | 71                | 28.2    | p = 0.405                  | p = 0.210            | p = 0.035                  |
| You haven't read or heard much about a plant-based diet                                      | 71       | 25.4    | 71                | 9.9     | 70                | 2.9     | p < 0.001                  | p = 0.125            | p < 0.001                  |
| Your friends or family encourage you to eat unhealthy foods with them                        | 70       | 41.4    | 70                | 35.7    | 69                | 31.9    | p = 0.556                  | p = 0.629            | p = 0.210                  |

NOTES: Number of responses may vary due to missing data.
